# Supplementary material for: Family A DNA Polymerase Phylogeny Uncovers Diversity and Replication Gene Organization in the Virioplankton
Source: Front Microbiol. 2018 Dec 14;9:3053. doi: 10.3389/fmicb.2018.03053 (PMC6302109; doi:10.3389/fmicb.2018.03053)
Supplement: Supplementary file 1 [file Table_1.xlsx]

## Sheet: Sheet1
Supplementary File S1. Predicted PolA peptides from Metagenomes Online.
Library General Details					DNA Pol I 762 Position					Metadata
Library Name	Short name	Prefix	Project	Peptides	Phe762	Phe762Leu	Phe762Tyr	Total Pol I	norm(Pol I)	Molecule	Upper Filter	Date	Physical	Modifier	Lat	Lat_hem	Lon	Lon_hem	Depth (m)	Salinity	Citation
MVSP FeCl method-5 virome	CAM_LIB_000037	ABF	MMI	9100916	5	11	12	28	3.07661	DNA	0.2	2009-04-07	Water		32.867	N	117.257	W	3	33.45	M.B. Sullivan, University of Arizona
MVSP FeCl method-6 virome	CAM_LIB_000038	ACF	MMI	6967647	1	6	3	10	1.4352	DNA	0.2	2009-04-07	Water		32.867	N	117.257	W	3	33.45	M.B. Sullivan, University of Arizona
MVSP HOT219S2C13_F2 virome	CAM_LIB_000129	AHM	MMI	3669300	0	5	0	5	1.36266	DNA	0.2	2010-03-11	Water		22.75	N	158	W	75	35.25	G. Steward, University of Hawaii
MVSP Boiling Springs Lake DNA virome	CAM_LIB_000093	ASB	MMI	3388514	1	0	0	1	0.295115	DNA	0.2	2009-09-26	Sediment	Acidic High Temperature	40.4363	N	121.398	W	1	152	D.L. Valentine, University of California Santa Barbara
ACTSLUDGE	ACTSLUDGE	ASL		190672	0	0	0	0	0	dsDNA			Solid Substrate		0		0				Liles et al. unpublished
MVSP Guaymas hydrothermal vent ssDNA virome	CAM_LIB_000126	AVK	MMI	5354447	1	0	0	1	0.186761	ssDNA	0.22	2008-11-23	Water	High Temperature	27.0673	N	111.244	W	1987		S.J. Williamson, J. Craig Venter Institute
MVSP Archaea-dominated Costa Rica cold seep RNA virome	CAM_LIB_000123	AXE	MMI	2267354	1	1	0	2	0.882085	RNA		2009-03-04	Sediment		40.7865	N	124.595	W	517	34.5	R. Vega Thurber, Oregon State University
MVSP Tampa Bay Lytic virome	CAM_LIB_000119	AYS	MMI	8508879	1	3	7	11	1.29277	DNA	0.2	2009-03-04	Water		27.7737	N	82.6215	W	3	35	J.H. Paul, University of South Florida
MVSP Mesocosm ME-08-9 virome	CAM_LIB_000122	BGC	MMI	2101643	1	0	11	12	5.70982	DNA		2009-08-22	Water		60	N	5	E	1	35	R. Sandaa, University of Bergen
MVSP Guaymas hydrothermal Vent Induced RNA virome	CAM_LIB_000096	BGS	MMI	823864	0	0	0	0	0	RNA	0.22	2008-11-25	Water	High Temperature	27.046	N	111.245	W	1987		S.J. Williamson, J. Craig Venter Institute
MVSP Arctic cryopeg brine virome	CAM_LIB_000115	BKD	MMI	954612	1	0	0	1	1.04755	DNA	0.2	2009-08-04	Water	Hypersaline Low Temperature	71.2906	N	156.789	W	6	130	J. Deming, University of Washington
MVSP Arctic frost flowers virome	CAM_LIB_000097	BOF	MMI	3311663	2	0	0	2	0.603926	DNA		2010-02-15	Water	Low Temperature	71.6182	N	156.86	W	0	13	J. Deming, University of Washington
BEARPAW	BEARPAW	BRP		1206216	1	0	0	1	0.829039	dsDNA		2003-10-07	Water	High Temperature	44.556	N	110.835	W	0		Schoenfeld et al. 2008
MVSP BATS 1000m virome	CAM_LIB_000106	BVX	MMI	5371690	4	2	0	6	1.11697	DNA		2009-07-17	Water		32	N	64	W	1000	35	M. Breitbart, University of South Florida
CBAY-Sept-2002	CBAY-WOMMACK	CBB		928195	3	2	3	8	8.61888	dsDNA	0.22	2002-09-27	Water		38.3	N	76.29	W	1	15.5-27	Bench et al. 2007.
CBAY-Oct-2004	CBAY-JCVI	CBJ		2908683	7	21	2	30	10.3139	dsDNA	0.22	2004-10-26	Water		38.3	N	76.29	W	2.1	6.56
CBAYVIR_RNA	CBAYVIR_RNA	CBR		910874	2	1	4	7	7.68493	RNA		2007-07-30	Water		38.97	N	76.383	W			Williamson et al. unpublished
CBAYVIR_ssDNA	CBAYVIR_ssDNA	CBS		927930	2	3	35	40	43.1067	ssDNA		2007-07-30	Water		38.97	N	76.38	W			Williamson et al. unpublished
MVSP HOT219S2C13_F4 virome	CAM_LIB_000118	CDY	MMI	5573571	3	27	2	32	5.74138	DNA	0.2	2010-03-11	Water		22.75	N	158	W	75	35.25	G. Steward, University of Hawaii
MVSP 13C-Enriched Aerobic Sediment Virome	CAM_LIB_000120	CDZ	MMI	1528705	1	0	0	1	0.654148	DNA	0.22	2010-02-01	Sediment		34.45	N	119.89	W	22	33.5	D.L. Valentine, University of California Santa Barbara
CBAYVIR1_dsDNA	CBAYVIR1_dsDNA	CFA		4173615	8	8	4	20	4.79201	dsDNA		2007-07-30	Water		38.97	N	76.38	W			Williamson et al. unpublished
CBAYVIR2_dsDNA	CBAYVIR2_dsDNA	CFB		4083705	11	6	8	25	6.12189	dsDNA		2007-07-30	Water		38.97	N	76.38	W			Williamson et al. unpublished
CBAYVIR3_dsDNA	CBAYVIR3_dsDNA	CFC		4416165	6	14	8	28	6.34034	dsDNA		2007-07-30	Water		38.97	N	76.38	W			Williamson et al. unpublished
CBAYVIR4_dsDNA	CBAYVIR4_dsDNA	CFD		4413706	10	20	7	37	8.38298	dsDNA		2007-07-31	Water		38.97	N	76.38	W			Williamson et al. unpublished
CBAYIND1_dsDNA	CBAYIND1_dsDNA	CIA		478381	0	1	1	2	4.18077	dsDNA		2007-07-30	Water		38.97	N	76.38	W			Williamson et al. unpublished
CBAYIND2_dsDNA	CBAYIND2_dsDNA	CIB		337464	0	0	0	0	0	dsDNA		2007-07-31	Water		38.97	N	76.38	W			Williamson et al. unpublished
MVSP ANME virome	CAM_LIB_000095	CNS	MMI	13143129	1	0	0	1	0.0760854	DNA		2009-09-25	Sediment	Anoxic	33.75	N	118.67	W	805	34.3	D.L. Valentine, University of California Santa Barbara
MVSP ME-08-8 virome	CAM_LIB_000104	CTU	MMI	3285828	0	1	1	2	0.608675	DNA		2009-08-21	Water		60	N	5	E	1	35	R. Sandaa, University of Bergen
MVSP Guaymas Hydrothermal Vent Induced ssDNA virome	CAM_LIB_000105	CVC	MMI	2267532	1	0	0	1	0.441008	ssDNA	0.22	2008-11-25	Water	High Temperature	27.046	N	111.245	W	1987		S.J. Williamson, J. Craig Venter Institute
MVSP Archimedes3	CAM_LIB_000138	DPY	MMI	6934006	1	2	0	3	0.43265	DNA		2008-05-01	Water		1.1903	N	12.9568	W	5200	34.84	C. Winter, University of Vienna
DRYTVIR_dsDNA	DRYTVIR_dsDNA	DTF		13078700	46	125	27	198	15.1391	dsDNA		2004-01-08	Water		24.488	N	83.07	W			Williamson et al. unpublished
DRYTVIR_RNA	DRYTVIR_RNA	DTR		1060997	0	1	6	7	6.59757	RNA		2004-01-08	Water		24.488	N	83.07	W			Williamson et al. unpublished
DRYTVIR_ssDNA	DRYTVIR_ssDNA	DTS		1099374	3	5	3	11	10.0057	ssDNA		2004-01-08	Water		24.488	N	83.07	W			Williamson et al. unpublished
MVSP ME-08-6 virome	CAM_LIB_000135	DYM	MMI	2337054	0	4	0	4	1.71156	DNA		2009-08-19	Water		60	N	5	E	1	35	R. Sandaa, University of Bergen
MVSP ME-08-7 virome	CAM_LIB_000114	EFL	MMI	475865	0	0	0	0	0	DNA		2009-08-20	Water		60	N	5	E	1	35	R. Sandaa, University of Bergen
MVSP Virome 142/01/15.5m	CAM_LIB_000238	ESY	MMI	3282947	0	0	0	0	0	DNA		2008-12-30	Water		52.3638	S	60.1687	W	15.5	33.63	J. M. Martinez, Bigelow Institute
MVSP Suboxic marine basin virome	CAM_LIB_000125	FKE	MMI	10781402	5	4	0	9	0.834771	DNA	0.22	2009-09-25	Sediment	Anoxic	33.75	N	118.67	W	805	34.3	E. Dinsdale, San Diego State University
MVSP Guaymas Hydrothermal Vent RNA virome	CAM_LIB_000139	FQV	MMI	4347901	0	1	0	1	0.229996	RNA	0.22	2008-11-23	Water	High Temperature	27.0673	N	111.244	W	1987		S.J. Williamson, J. Craig Venter Institute
MVSP Great Boiling Spring virome	CAM_LIB_000100	FSH	MMI	6017804	6	0	1	7	1.16322	DNA	0.2	2008-10-22	Water	High Temperature	44.5341	N	110.798	W	0.01		T. Schoenfeld, Lucigen Corporation
MVSP HOT219S2C13_F3 virome	CAM_LIB_000130	FUU	MMI	4319774	1	7	3	11	2.54643	DNA	0.2	2010-03-11	Water		22.75	N	158	W	75	35.25	G. Steward, University of Hawaii
MVSP 13C-enriched ANME virome	CAM_LIB_000094	FVO	MMI	6758463	0	0	0	0	0	DNA	0.22	2009-09-25	Sediment	Anoxic	33.75	N	118.67	W	805	34.4	D.L. Valentine, University of California Santa Barbara
GOMVIR_dsDNA	GOMVIR_dsDNA	GMF		14181869	24	143	47	214	15.0897	dsDNA			Water		0		0				Williamson et al. unpublished
MVSP Healthy Gorgonian virome	CAM_LIB_000020	GNX	MMI	7667777	3	1	1	5	0.652079	DNA		2009-05-25	Tissue/Humor		17.9431	N	67.0538	W	3	35.72	I. Hewson, Cornell University
GWAB	GWAB	GWB		597980	2	2	0	4	6.68919	dsDNA			Water	Acidic High Temperature	9.84	N	104.28	W			Wommack et al. unpublished
GWAC	GWAC	GWC		486475	0	6	0	6	12.3336	dsDNA			Water	Acidic High Temperature	9.84	N	104.28	W			Wommack et al. unpublished
MVSP Diseased Gorgonian virome	CAM_LIB_000021	GYV	MMI	6253944	0	0	1	1	0.159899	DNA		2009-05-25	Tissue/Humor		17.9431	N	67.0538	W	3	35.72	I. Hewson, Cornell University
MVSP Shark gut virome 4	CAM_LIB_000024	HVB	MMI	1588188	1	0	1	2	1.2593	DNA	0.22	2009-04-13	Tissue/Humor		4.02686	S	154.957	W	1	33	F. Rohwer, San Diego State University
MVSP Shark gut virome 5	CAM_LIB_000025	IBJ	MMI	4797521	2	6	2	10	2.08441	DNA	0.22	2009-04-23	Tissue/Humor		9.97943	S	150.219	W	1	33	F. Rohwer, San Diego State University
MVSP C02-augmented seawater virome	CAM_LIB_000027	ISX	MMI	5912284	0	1	0	1	0.169139	DNA	0.45	2009-07-24	Water		32.665	N	117.278	W	1		E. Dinsdale, San Diego State University
MVSP EPR Hydrothermal Vent RNA virome	CAM_LIB_000029	IXX	MMI	4357517	0	0	0	0	0	RNA	0.22	2008-11-15	Water	High Temperature	9.5032	N	104.175	W	2505		S.J. Williamson, J. Craig Venter Institute
MVSP EPR Hydrothermal Vent ssDNA virome	CAM_LIB_000030	JDS	MMI	2819615	3	3	0	6	2.12795	ssDNA	0.22	2008-11-15	Water	High Temperature	9.5032	N	104.175	W	2505		S.J. Williamson, J. Craig Venter Institute
MVSP EPR Hydrothermal Vent Induced RNA virome	CAM_LIB_000031	JTX	MMI	4574423	0	2	0	2	0.437214	RNA	0.22	2008-11-14	Water	High Temperature	9.5017	N	104.175	W	2511		S.J. Williamson, J. Craig Venter Institute
MVSP EPR Hydrothermal Vent Induced ssDNA virome	CAM_LIB_000032	JXK	MMI	8907078	5	5	3	13	1.45951	ssDNA	0.22	2008-11-14	Water	High Temperature	9.5017	N	104.175	W	2511		S.J. Williamson, J. Craig Venter Institute
MVSP FeCl method-1 virome	CAM_LIB_000033	KLO	MMI	8985188	4	18	14	36	4.00659	DNA	0.2	2009-04-07	Water		32.867	N	117.257	W	3	33.45	M.B. Sullivan, University of Arizona
MVSP FeCl method-2 virome	CAM_LIB_000034	KLP	MMI	5649972	2	7	5	14	2.47789	DNA	0.2	2009-04-07	Water		32.867	N	117.257	W	3	33.45	M.B. Sullivan, University of Arizona
KPRAIRIE	KPRAIRIE	KPR		290084	0	0	0	0	0	dsDNA	0.2		Soil		39.1	N	96.6	W			Fierer et al. 2007
MVSP FeCl method-3 virome	CAM_LIB_000035	KTE	MMI	8695090	3	14	9	26	2.99019	DNA	0.2	2009-04-07	Water		32.867	N	117.257	W	3	33.45	M.B. Sullivan, University of Arizona
MVSP FeCl method-4 virome	CAM_LIB_000036	KTR	MMI	10933047	7	21	10	38	3.4757	DNA	0.2	2009-04-07	Water		32.867	N	117.257	W	3	33.45	M.B. Sullivan, University of Arizona
MVSP Subarctic Pacific 2 virome	CAM_LIB_000236	KUR	MMI	4941310	1	1	0	2	0.404751	DNA	0.2	2009-02-04	Water		50	N	145	W	500	34.11	M.B. Sullivan, University of Arizona
MVSP Virome Archaeal dominated cold seeps Costa Rica dsDNA virome	CAM_LIB_000108	LQJ	MMI	4842535	1	22	0	23	4.74958	DNA		2009-03-04	Sediment		40.7865	N	124.595	W	517	34.5	R. Vega Thurber, Oregon State University
MVSP Virome Archaeal dominated cold seeps Costa Rica ssDNA virome	CAM_LIB_000098	LRV	MMI	4278779	3	12	0	15	3.50567	ssDNA		2009-03-04	Sediment		40.7865	N	124.595	W	517	34.5	R. Vega Thurber, Oregon State University
MB-SED	MB-SED	MBS		204909	1	1	0	2	9.76043	dsDNA	0.2	2001-06-01	Sediment		32.78	N	117.224	W			Breitbart et al. 2004
MB-SW	MB-SW	MBW		135500	0	0	0	0	0	dsDNA	0.16	2001-06-01	Water		32.78	N	117.224	W			Breitbart et al. 2002
marine_metagenome_G8293	CAM_LIB_000131	MPV	MMI	4607061	0	0	2	2	0.434116	DNA	0.2	2009-03-04	Water		27.7737	N	82.6215	W	3	35	J.H. Paul, University of South Florida
MATAPEAKE	MATAPEAKE	MTZ		1185577	2	0	0	2	1.68694	dsDNA			Soil		39.667	N	75.746	W			Wommack et al. unpublished
marine_metagenome_G2362	CAM_LIB_000132	MYP	MMI	3490388	0	0	1	1	0.286501	DNA		2003-10-04	Water		37.18	N	14.98	E	2400	38.4	C. Winter, University of Vienna
Hot_Springs_metagenome_G8435	CAM_LIB_000206	OJI	MMI	3962820	1	0	0	1	0.252346	DNA	0.2	2010-06-02	Water	Acidic	44.7535	N	110.724	W			M. Young, Montana St. Univ.
OCTOPUS SPRING	OCTOPUS SPRING	OSR		3665032	0	0	0	0	0	dsDNA		2003-10-04	Water	High Temperature	44.534	N	110.798	W			Schoenfeld et al. 2008
marine_metagenome_G8519	CAM_LIB_000207	PUT	MMI	3011342	0	1	0	1	0.332078	DNA	0.2	2009-02-04	Water		50	N	145	W	2000	34.58	M.B. Sullivan, University of Arizona
marine_metagenome_G8518	CAM_LIB_000208	PUV	MMI	2395867	1	1	0	2	0.834771	DNA	0.2	2009-06-09	Water		48.582	N	130.4	W	500	34.06	M.B. Sullivan, University of Arizona
marine_metagenome_G7176	CAM_LIB_000217	QXV	MMI	11862158	9	8	8	25	2.10754	DNA	0.2	2007-07-31	Water		38.967	N	76.378	W	22	19.1	K. Eric Wommack, Univ. of Delaware
marine_metagenome_G8524	CAM_LIB_000223	SDO	MMI	10727937	2	14	9	25	2.33036	DNA		2009-04-14	Water		54.1873	N	7.8964	E	0.5	32.9	M. Duhaime, Univ. Michigan
SIOPIER-SW	SIOPIER-SW	SIP		175331	1	1	0	2	11.407	dsDNA	0.16	2001-05-01	Water		32.867	N	117.257	W			Breitbart et al. 2002
marine_metagenome_G4108	CAM_LIB_000225	SQI	MMI	2294770	0	0	1	1	0.435774	DNA	1.2	2009-09-04	Water		43.3675	N	67.5526	W	1	32.36	W. Wilson, Bigelow Institute
marine_metagenome_G7174	CAM_LIB_000245	UJF	MMI	14747735	14	15	16	45	3.05132	DNA	0.2	2007-07-30	Water		38.967	N	76.378	W	22	19.1	K. Eric Wommack, Univ. of Delaware
marine_metagenome_G7175	CAM_LIB_000246	USR	MMI	7144507	4	2	8	14	1.95955	DNA	0.2	2007-07-30	Water		38.967	N	76.378	W	22	19.1	K. Eric Wommack, Univ. of Delaware
marine_metagenome_G8520	CAM_LIB_000249	VXA	MMI	3928726	1	2	0	3	0.763606	DNA	0.2	2009-02-04	Water	Anoxic	50	N	145	W	1000	34.38	M.B. Sullivan, University of Arizona
marine_metagenome_G7173	CAM_LIB_000251	WCG	MMI	6870460	6	3	7	16	2.32881	DNA	0.2	2007-07-30	Water		38.967	N	76.378	W	22	19.1	K. Eric Wommack, Univ. of Delaware
marine_metagenome_G8517	CAM_LIB_000254	WRX	MMI	6962400	1	5	0	6	0.861772	DNA	0.2	2009-06-09	Water	Anoxic	48.582	N	130.4	W	1000	34.37	M.B. Sullivan, University of Arizona
marine_metagenome_G2377	CAM_LIB_000257	WWN	MMI	154891	0	0	5	5	32.2808	DNA	0.45	2002-06-22	Water		49.11	N	123.11	W	0.5	12	C.A. Suttle, Univ. of British Columbia
Marine_Metagenome_G2845	CAM_LIB_000258	XKC	MMI	405135	0	0	21	21	51.8346	DNA	0.45	2006-07-18	Water		48.28	N	123.19	W	0.5	33	C.A. Suttle, Univ. of British Columbia
marine_metagenome_G8522	CAM_LIB_000262	XTG	MMI	7078721	3	12	5	20	2.82537	DNA	0.2	2009-02-04	Water		50	N	145	W	10	32.56	M.B. Sullivan, University of Arizona
marine_metagenome_G8515	CAM_LIB_000263	XTT	MMI	6426952	0	2	0	2	0.31119	DNA	0.2	2009-06-07	Water		48.39	N	123.4	W	500	32	M.B. Sullivan, University of Arizona
marine_metagenome_G8523	CAM_LIB_000266	YBW	MMI	11627421	1	12	12	25	2.15009	DNA		2009-06-16	Water		54.1873	N	7.8964	E	0.5	31.55	M. Duhaime, Univ. Michigan
marine_metagenome_G2844	CAM_LIB_000268	YEH	MMI	394500	0	0	10	10	25.3485	DNA	0.45	2006-06-28	Water		49.19	N	123.15	W	0.5	23.3	C.A. Suttle, Univ. of British Columbia
marine_metagenome_G2331	CAM_LIB_000382	YIA		926833	0	0	1	1	1.07894	DNA	0.22	2009-04-19	Water		9.90774	S	150.11	W	10	33	F. Rohwer, San Diego State University
