# Supplementary material for: Family A DNA Polymerase Phylogeny Uncovers Diversity and Replication Gene Organization in the Virioplankton
Source: Front Microbiol. 2018 Dec 14;9:3053. doi: 10.3389/fmicb.2018.03053 (PMC6302109; doi:10.3389/fmicb.2018.03053)
Supplement: Supplementary file 2 [file Table_2.xlsx]

## Sheet: Sheet1
Supplementary File S2: Gene neighbor association by 762 group.
Pol I Group	n Contigs	% Contigs	Top-5 Associated Genes	Clusters
Tyr762 Group	136	0.5506	Exonuclease	26-31,33,37-39,41,43,45,47,48,50
	91	0.3684	Endonuclease	26-33,39,43-45,48,50
	73	0.2955	Nucleoside Triphosphate Pyrophosphohydrolase	26,27,30-34,38,39,41,42,44,47,50
	39	0.1579	DNA-directed RNA polymerase	26-31,35,38,39,47,50
	36	0.1457	Bacteriophage head to tail connecting protein	27-33,37-39,42,43
Leu762 Group I	106	0.5354	Primase	12
	37	0.1869	Terminase	12,13
	30	0.1515	Methyltransferase	12
	29	0.1465	Peptidase	12
	24	0.1212	Molecular chaperone	12
Leu762 Group II	37	0.3592	VRR-NUC containing protein	51,55,63,66,72,73-77,81
	26	0.2524	Metallopeptidase	73-75,77-79,81
	18	0.1748	ATPase	57,74,75,78-80
	17	0.165	Terminase	55,58,62,66,72,75,77,81
	16	0.1553	Primase	53,55-58,60,65,67,75,80
Phe762 Group I	62	0.5905	Endonuclease	1,3,9,18,19,20,21,22
	56	0.5333	Primase	9,17,20,21,23
	28	0.2667	Nucleoside Triphosphate Pyrophosphohydrolase	1,9,19,20,21
	24	0.2286	Integrase	21
	17	0.1619	Thymidylate synthase complementing protein	1,9,19-21
Phe762 Group II	10	0.3125	Trimeric dUTP diphosphatase	4,6
	9	0.2813	HNH nuclease	4,6
	8	0.25	RNA Sigma Factor	4,8
	7	0.2188	Primase	4,6-8,25
	7	0.2188	FAD-dependent thymidylate synthase	4,6
